# Supplementary material for: Use of Anti-Tumor Necrosis Factor Therapy: A Retrospective Study of Monotherapy and Adherence to Combination Therapy with Non-Biologic Disease-Modifying Anti-Rheumatic Drugs
Source: PubMed Central journal article supplement — Rheumatol Ther. 2015 Aug 25;2(2):127–39. doi: 10.1007/s40744-015-0015-x (PMC4883262; doi:10.1007/s40744-015-0015-x), 2015-08-25
Supplement: 40744_2015_15_MOESM1_ESM.pdf [file 40744_2015_15_MOESM1_ESM.pdf]

- The objectives of this retrospective US claims-based study were to examine the use of anti-tumor necrosis factor (anti-TNF) monotherapy, adherence with non-biologic disease-modifying anti-rheumatic drugs (nbDMARDs) in patients receiving concomitant anti-TNF therapy, and persistence with anti-TNF medications in 9,764 patients with rheumatoid arthritis.
- Approximately one-third of patients received an anti-TNF as monotherapy.
- Among biologic-naïve combination therapy patients, 53% adhered to nbDMARD therapy <80% of the time while receiving anti-TNF therapies and 33% had <60% adherence.
- There was no significant association between adherence to concomitant nbDMARDs and anti-TNF persistence; however, lack of adherence with nbDMARDs resulted in poorer anti-TNF persistence in the period >90 days after starting anti-TNF therapy.
- As there is a large proportion of patients who take anti-TNF as monotherapy even when it is prescribed as a combination, physicians should consider prescribing a biologic that is known to be equally efficacious with or without concomitant nbDMARD therapy.

This summary slide represents the opinions of the authors. Sponsorship for this study was funded by Genentech, Inc. Medical writing assistance for this study was provided by Denise Kenski, PhD, from Health Interactions. For a full list of acknowledgments and conflicts of interest for all authors of this article, please see the full text online. Copyright © The Authors 2015. Creative Commons Attribution Noncommercial License (CC BY-NC).
